# Supplementary material
Source: PubMed Central journal article supplement (PMC3303753)
Supplement: NIHMS345516-supplement-S2.pdf [file NIHMS345516-supplement-S2.pdf]

| <b>Primer</b>                                     | <b>Nucleotide Sequence (5' to 3')</b>                                           | <b>Direction</b> | <b>RE site</b> |
|---------------------------------------------------|---------------------------------------------------------------------------------|------------------|----------------|
| <b>5' FLAG-gngt1-WT F (for nos3'UTR entry)</b>    | CCG AAG CTT CAC CAT GGA TTA CAA GGA TGA CGA CGA TAA GCC GAT CAT AGA TGT AGA A   | Forward          | HindIII        |
| <b>3' pT3TS R (for nos3'UTR entry)</b>            | CTA CTC GAG AAC CAG ATC CTA GTC AGT CA                                          | Reverse          | XhoI           |
| <b>gngt1 (section 1-2) F</b>                      | CAG CTT AAG ACT GAG GTG AAG CTA GAA                                             | Forward          | AfIII          |
| <b>gngt1 (section 2-1) R</b>                      | AGT CTT AAG CTG GGT TAC TTC CAT CTT                                             | Reverse          | AfIII          |
| <b>gngt1 (section 2-3) F</b>                      | TGA GGA TCC TCT GGT CAA AGG CAT TCC A                                           | Forward          | BamHI          |
| <b>gngt1 (section 3-2) R</b>                      | AGA GGA TCC TCA TCC GCT CCT CCT TGA                                             | Reverse          | BamHI          |
| <b>5' FLAG-gng2-WT F (for nos3'UTR entry)</b>     | TCC AAG CTT GCC ACC ATG GAT TAC AAG GAT GAC GAC GAT AAG GCC ACC AAC AAC ACA GCT | Forward          | HindIII        |
| <b>gng2 (section 1-2) F</b>                       | CAG CTT AAG ATG GAG GCC AAT ATT GAC                                             | Forward          | AfII           |
| <b>gng2 (section 2-1) R</b>                       | CAT CTT AAG CTG CTC CAC CAG TTT GC                                              | Reverse          | AfII           |
| <b>gng2 (section 2-3) F</b>                       | GGA GGA TCC CCT GCT GTC GCC CGT                                                 | Forward          | BamHI          |
| <b>gng2 (section 3-2) R</b>                       | AGG GGA TCC TCC TTG GCA TGG GCT TCG                                             | Reverse          | BamHI          |
| <b>5' FLAG-gng15-WT F (for nos3'UTR entry)</b>    | CCG AAG CTT GCC ACC ATG GAT TAC AAG GAT GAC GAC GAT AAG GAC GTT TAC TGC AGT AAT | Forward          | HindIII        |
| <b>gng15 (section 1-2) F</b>                      | CAG CTT AAG ATG GAG ACT GAA CTG CAG                                             | Forward          | AfII           |
| <b>gng15 (section 2-1) R</b>                      | CAT CTT AAG CTG CTC CAC GGC TCT CCT                                             | Reverse          | AfII           |
| <b>gng15 (section 2-3) F</b>                      | AGC GGA TCC TCT GCT CAC CGG CAT CGC                                             | Forward          | BamHI          |
| <b>gng15 (section 3-2) R</b>                      | AGA GGA TCC GCT CTG CGG TGC TCC T                                               | Reverse          | BamHI          |
| <b>3' gngt1 R (CVIC-&gt;CAIL)</b>                 | GGC CTC GAG TTA GAG AAT GGC ACA TCC ACC TTT CT                                  | Reverse          | XhoI           |
| <b>gng2 mutagenic F (CAIL-&gt;CVIC)</b>           | GTT CTT CTG TGT CAT TTG CTA ACT AGT CTC GAG -                                   | Forward          | -              |
| <b>gng2 mutagenic R (CAIL-&gt;CVIC)</b>           | CTC GAG ACT AGT TAG CAA ATG ACA CAG AAG AAC -                                   | Reverse          | -              |
| <b>5' FLAG-gngt2a F (for nos3'UTR entry)</b>      | CCG AAG CTT CAC CAT GGA TTA CAA GGA TGA CGA CGA TAA GGC CCG GGA TAT GTC CGA T   | Forward          | HindIII        |
| <b>gngt1 'translocates 1st site' mutagenic F</b>  | GTC AAA GGC ATT CCA GAG TCG GAG AAC CCG TTC AAG GAG                             | Forward          | -              |
| <b>gngt1 'translocates 1st site' mutagenic R</b>  | CTC CTT GAA CGG GTT CTC CGA CTC TGG AAT GCC TTT GAC                             | Reverse          | -              |
| <b>gngt1 'translocates 2nd site' mutagenic F</b>  | AAC CCG TTC AAG GAG AAA AAG TTT TTC TGT GTC ATT TGC TAA CTC GAG                 | Forward          | -              |
| <b>gngt1 'translocates 2nd site' mutagenic R</b>  | CTC GAG TTA GCA AAT GAC ACA GAA AAA CTT TTT CTC CTT GAA CGG GTT                 | Reverse          | -              |
| <b>gng2 'translocates 1st site' mutagenic F</b>   | GTC GCC CGT GCC TGC AGA CAA AAA CCC CTT CAG GGA GAA G                           | Forward          | -              |
| <b>gng2 'translocates 1st site' mutagenic R</b>   | CTT CTC CCT GAA GGG GTT TTT GTC TGC AGG CAC GGG CGA C                           | Reverse          | -              |
| <b>gng2 'translocates 2nd site' mutagenic F</b>   | AAC CCC TTC AGG GAG AAG GGC GGC TGT GCC ATC CTG TAA CTC                         | Forward          | -              |
| <b>gng2 'translocates 2nd site' mutagenic R</b>   | GAG TTA CAG GAT GGC ACA GCC GCC CTT CTC CCT GAA GGG GTT                         | Reverse          | -              |
| <b>gngt2a 'translocates 1st site' mutagenic F</b> | CTC GTA AAA GGA GTT CCT GAG TCC GAA AAC CCA TTC AAG GAG AAG                     | Forward          | -              |
| <b>gngt2a 'translocates 1st site' mutagenic R</b> | CTT CTC CTT GAA TGG GTT TTC GGA CTC AGG AAC TCC TTT TAC GAG                     | Reverse          | -              |
| <b>gngt2a 'translocates 2nd site' mutagenic F</b> | AAC CCA TTC AAG GAG AAG AAG TTT TTC TGC ATA ATA ACG TAG CTC GAG                 | Forward          | -              |
| <b>gngt2a 'translocates 2nd site' mutagenic R</b> | CTC GAG CTA CGT TAT TAT GCA GAA AAA CTT CTT CTC CTT GAA TGG GTT                 | Reverse          | -              |
